# Supplementary material for: Kinetics Drying of Blackberry Bagasse and Degradation of Anthocyanins and Bioactive Properties
Source: PubMed Central journal article supplement (PMC8065409; doi:10.3390/antiox10040548), 2021-04-01
Supplement: antioxidants-10-00548-s001.pdf [file antioxidants-10-00548-s001.pdf]

## S1. Bioactive properties

| Tme         | Temperature | TPC    | Anthocyanin | CA        | Moisture |            |
|-------------|-------------|--------|-------------|-----------|----------|------------|
| Degradation |             |        |             |           |          |            |
| t0          | T50         | 1.9582 | 0.8019      | 813.0006  | 0.8007   | 0.0000000  |
| t0          | T50         | 1.9138 | 0.9362      | 819.0579  | 0.8339   | 0.0000000  |
| t0          | T50         | 1.8604 | 0.9458      | 782.7145  | 0.8333   | 0.0000000  |
| t0          | T50         | 1.9493 | 0.8311      | 806.9434  | 0.8025   | 0.0000000  |
| t1          | T50         | 2.5360 | 0.7247      | 1323.5116 | 0.7765   | 9.6227100  |
| t1          | T50         | 2.5627 | 0.7617      | 1291.5993 | 0.7845   | 18.6414024 |
| t1          | T50         | 2.7493 | 0.7142      | 1316.1472 | 0.7732   | 24.4853954 |
| t1          | T50         | 2.7049 | 0.7500      | 1330.8760 | 0.7754   | 9.7518395  |
| t2          | T50         | 2.9093 | 0.7363      | 1488.5267 | 0.7712   | 8.1848894  |
| t2          | T50         | 2.8204 | 0.7147      | 1443.3151 | 0.7643   | 23.6564842 |
| t2          | T50         | 2.9004 | 0.7239      | 1480.9915 | 0.7673   | 23.4560343 |
| t2          | T50         | 2.8916 | 0.7353      | 1528.7148 | 0.7709   | 11.5245009 |
| t3          | T50         | 2.9360 | 0.6975      | 1825.2302 | 0.7554   | 13.0146295 |
| t3          | T50         | 3.1138 | 0.6749      | 1794.4641 | 0.7472   | 27.9079861 |
| t3          | T50         | 3.1493 | 0.6955      | 1750.5125 | 0.7547   | 26.4568407 |
| t3          | T50         | 3.1049 | 0.6787      | 1796.6617 | 0.7518   | 18.3330506 |
| t4          | T50         | 3.1938 | 0.6816      | 1186.3712 | 0.7465   | 15.0061304 |
| t4          | T50         | 3.2116 | 0.6833      | 1179.8235 | 0.7503   | 27.0129711 |
| t4          | T50         | 3.2382 | 0.6705      | 1196.1927 | 0.7423   | 29.1094561 |
| t4          | T50         | 3.2560 | 0.6843      | 1170.0019 | 0.7475   | 17.6654508 |
| t5          | T50         | 3.3182 | 0.6343      | 1241.9447 | 0.7276   | 20.9032821 |
| t5          | T50         | 3.3538 | 0.6806      | 1224.4306 | 0.7398   | 27.2984456 |
| t5          | T50         | 3.3804 | 0.6460      | 1347.0294 | 0.7292   | 31.6955343 |
| t5          | T50         | 3.3538 | 0.6329      | 1340.0238 | 0.7236   | 23.8446378 |
| t6          | T50         | 3.3982 | 0.6053      | 1440.2277 | 0.7003   | 24.5137029 |
| t6          | T50         | 3.4604 | 0.5839      | 1279.5212 | 0.6893   | 37.6300826 |
| t6          | T50         | 3.3893 | 0.6337      | 1260.3895 | 0.7103   | 32.9987091 |
| t6          | T50         | 3.4693 | 0.6293      | 1447.8804 | 0.7014   | 24.2848204 |
| t7          | T50         | 3.7716 | 0.5707      | 1641.6984 | 0.667    | 28.8272056 |
| t7          | T50         | 3.6560 | 0.5975      | 1638.1323 | 0.6783   | 36.1771664 |
| t7          | T50         | 3.5938 | 0.5500      | 1609.6035 | 0.6505   | 41.8492171 |
| t7          | T50         | 3.5404 | 0.5737      | 1620.3018 | 0.6687   | 30.9736763 |
| t8          | T50         | 3.9049 | 0.5312      | 2012.5890 | 0.6341   | 33.7546073 |
| t8          | T50         | 3.8071 | 0.5275      | 1997.7899 | 0.6233   | 43.6583783 |
| t8          | T50         | 3.8160 | 0.5185      | 2016.2888 | 0.6168   | 45.1754511 |
| t8          | T50         | 4.0204 | 0.5448      | 2008.8893 | 0.6353   | 34.4450377 |
| t9          | T50         | 5.7004 | 0.5065      | 2230.2725 | 0.5864   | 36.8364133 |
| t9          | T50         | 6.0471 | 0.5020      | 2188.4134 | 0.5784   | 46.3755798 |
| t9          | T50         | 5.9138 | 0.5086      | 2244.2256 | 0.5669   | 46.2195134 |
| t9          | T50         | 5.8693 | 0.4921      | 2202.3665 | 0.5611   | 40.7909726 |
| t0          | T60         | 1.9582 | 0.8019      | 813.0006  | 0.8007   | 0.0000000  |
| t0          | T60         | 1.9138 | 0.9362      | 819.0579  | 0.8339   | 0.0000000  |
| t0          | T60         | 1.8604 | 0.9458      | 782.7145  | 0.8333   | 0.0000000  |
| t0          | T60         | 1.9493 | 0.8311      | 806.9434  | 0.8025   | 0.0000000  |
| t1          | T60         | 2.6960 | 0.6835      | 959.3837  | 0.7567   | 14.7637773 |
| t1          | T60         | 2.5538 | 0.7476      | 930.7024  | 0.7689   | 20.1403914 |
| t1          | T60         | 2.5893 | 0.7006      | 997.6253  | 0.7534   | 25.9185193 |
| t1          | T60         | 2.9982 | 0.6947      | 1121.9107 | 0.7513   | 16.4074239 |
| t2          | T60         | 3.0338 | 0.6507      | 1133.4799 | 0.7411   | 18.8594156 |
| t2          | T60         | 3.0338 | 0.6801      | 1267.3164 | 0.7396   | 27.3542840 |
| t2          | T60         | 3.0960 | 0.7047      | 1254.2591 | 0.7487   | 25.4866475 |

|    |     |        |        |           |        |            |
|----|-----|--------|--------|-----------|--------|------------|
| t2 | T60 | 3.3182 | 0.6404 | 1113.8941 | 0.7167 | 22.9475914 |
| t3 | T60 | 3.5049 | 0.6767 | 1283.6063 | 0.7287 | 15.6189916 |
| t3 | T60 | 3.3360 | 0.6892 | 1309.5442 | 0.7305 | 26.3832200 |
| t3 | T60 | 3.4604 | 0.6791 | 1286.8486 | 0.7265 | 28.1951366 |
| t3 | T60 | 3.4338 | 0.6708 | 1283.6063 | 0.7231 | 19.2896923 |
| t4 | T60 | 3.5493 | 0.6278 | 1650.2937 | 0.7076 | 21.7080453 |
| t4 | T60 | 3.6027 | 0.6240 | 1677.5267 | 0.6954 | 33.3515722 |
| t4 | T60 | 3.5316 | 0.6305 | 1671.4749 | 0.7054 | 33.3379832 |
| t4 | T60 | 3.5316 | 0.6860 | 1644.2419 | 0.7198 | 17.4579248 |
| t5 | T60 | 3.6827 | 0.6280 | 1999.8166 | 0.6905 | 21.6827490 |
| t5 | T60 | 3.6116 | 0.6384 | 1968.9737 | 0.6854 | 31.8036131 |
| t5 | T60 | 3.6560 | 0.6189 | 2067.6709 | 0.6894 | 34.5663277 |
| t5 | T60 | 3.6649 | 0.6018 | 2046.0809 | 0.6734 | 27.5933058 |
| t6 | T60 | 3.7449 | 0.7390 | 2180.8998 | 0.6201 | 7.8384781  |
| t6 | T60 | 3.8604 | 0.7807 | 2148.2336 | 0.6376 | 16.6087963 |
| t6 | T60 | 3.9138 | 0.7477 | 2139.3247 | 0.6245 | 20.9419404 |
| t6 | T60 | 3.8871 | 0.6939 | 2124.4764 | 0.6203 | 16.5026406 |
| t7 | T60 | 4.1716 | 0.5752 | 2213.1528 | 0.5119 | 28.2684651 |
| t7 | T60 | 4.7227 | 0.6314 | 2181.0547 | 0.5348 | 32.5570842 |
| t7 | T60 | 4.4827 | 0.5993 | 2189.8087 | 0.5207 | 36.6339039 |
| t7 | T60 | 4.7049 | 0.5892 | 2210.2348 | 0.5198 | 29.1071155 |
| t8 | T60 | 5.5938 | 0.5692 | 2444.9093 | 0.4954 | 29.0128119 |
| t8 | T60 | 5.3182 | 0.5658 | 2422.5566 | 0.4809 | 39.5599221 |
| t8 | T60 | 5.3004 | 0.5973 | 2447.7034 | 0.4938 | 36.8434156 |
| t8 | T60 | 6.2871 | 0.5885 | 2425.3507 | 0.4752 | 29.1898167 |
| t9 | T60 | 6.5538 | 0.4458 | 2548.1297 | 0.2975 | 44.4099259 |
| t9 | T60 | 6.6071 | 0.4251 | 2565.1926 | 0.2785 | 54.5965196 |
| t9 | T60 | 6.5538 | 0.4194 | 2576.5679 | 0.2894 | 55.6527573 |
| t9 | T60 | 6.5982 | 0.4265 | 2562.3488 | 0.2962 | 48.6761715 |
| t0 | T70 | 1.9582 | 0.8019 | 813.0006  | 0.8007 | 0.0000000  |
| t0 | T70 | 1.9138 | 0.9362 | 819.0579  | 0.8339 | 0.0000000  |
| t0 | T70 | 1.8604 | 0.9458 | 782.7145  | 0.8333 | 0.0000000  |
| t0 | T70 | 1.9493 | 0.8311 | 806.9434  | 0.8025 | 0.0000000  |
| t1 | T70 | 2.1716 | 0.6507 | 1161.9590 | 0.7411 | 18.8594156 |
| t1 | T70 | 1.9493 | 0.6535 | 1156.0873 | 0.7389 | 30.1996893 |
| t1 | T70 | 2.1004 | 0.6475 | 1182.5101 | 0.7465 | 31.5381913 |
| t1 | T70 | 1.9938 | 0.6563 | 1188.3819 | 0.7466 | 21.0344577 |
| t2 | T70 | 2.3138 | 0.6600 | 1432.8106 | 0.7382 | 17.7007412 |
| t2 | T70 | 2.2338 | 0.6258 | 1441.5419 | 0.7239 | 33.1562638 |
| t2 | T70 | 2.7316 | 0.6721 | 1456.0939 | 0.7365 | 28.9366016 |
| t2 | T70 | 2.7138 | 0.6115 | 1438.6315 | 0.7104 | 26.4184719 |
| t3 | T70 | 3.2560 | 0.6089 | 1652.8960 | 0.7056 | 24.0695689 |
| t3 | T70 | 3.0693 | 0.6249 | 1734.6001 | 0.7097 | 33.2472155 |
| t3 | T70 | 2.7493 | 0.6414 | 1699.5840 | 0.7104 | 32.1870506 |
| t3 | T70 | 2.8738 | 0.6776 | 1696.6660 | 0.7195 | 18.4726522 |
| t4 | T70 | 3.3271 | 0.6404 | 1978.6308 | 0.6965 | 20.1344673 |
| t4 | T70 | 3.2916 | 0.6340 | 1975.7379 | 0.6934 | 32.2814742 |
| t4 | T70 | 3.7982 | 0.6370 | 1978.6308 | 0.6813 | 32.6467542 |
| t4 | T70 | 3.4071 | 0.6248 | 1972.8451 | 0.6889 | 24.8210932 |
| t5 | T70 | 4.6071 | 0.6393 | 2107.7932 | 0.6723 | 20.2793425 |
| t5 | T70 | 4.5271 | 0.5878 | 2122.2326 | 0.6436 | 37.2127915 |
| t5 | T70 | 4.2427 | 0.6200 | 2125.1204 | 0.6656 | 34.4432064 |
| t5 | T70 | 4.5271 | 0.5704 | 2139.5598 | 0.6403 | 31.3664165 |
| t6 | T70 | 5.1227 | 0.7037 | 2185.8002 | 0.5857 | 12.2404446 |

|    |     |         |        |           |        |            |
|----|-----|---------|--------|-----------|--------|------------|
| t6 | T70 | 5.0071  | 0.6516 | 2243.0648 | 0.5658 | 30.3984979 |
| t6 | T70 | 4.9271  | 0.6246 | 2245.9280 | 0.5436 | 33.9548341 |
| t6 | T70 | 4.9804  | 0.6016 | 2208.7060 | 0.5656 | 27.6149196 |
| t7 | T70 | 5.2916  | 0.3629 | 2375.4131 | 0.1906 | 54.7465924 |
| t7 | T70 | 5.0160  | 0.3572 | 2375.4131 | 0.1898 | 61.8451548 |
| t7 | T70 | 5.3093  | 0.3655 | 2349.7535 | 0.1904 | 61.3577143 |
| t7 | T70 | 5.1849  | 0.3581 | 2355.4557 | 0.1798 | 56.9103813 |
| t8 | T70 | 7.7360  | 0.3565 | 2670.8594 | 0.0368 | 55.5413543 |
| t8 | T70 | 8.5182  | 0.3507 | 2636.7624 | 0.0394 | 62.5355680 |
| t8 | T70 | 8.6249  | 0.3501 | 2656.6523 | 0.0376 | 62.9846616 |
| t8 | T70 | 8.9360  | 0.3442 | 2645.2867 | 0.0401 | 58.5791557 |
| t9 | T70 | 10.6071 | 0.3487 | 2869.2743 | 0.0089 | 56.5211463 |
| t9 | T70 | 11.5227 | 0.3460 | 2860.6626 | 0.0076 | 63.0386773 |
| t9 | T70 | 11.5227 | 0.3490 | 2903.7213 | 0.0098 | 63.1014075 |
| t9 | T70 | 10.1004 | 0.3468 | 2886.4978 | 0.0098 | 58.2719865 |
| t0 | T80 | 1.9582  | 0.8019 | 813.0006  | 0.8007 | 0.0000000  |
| t0 | T80 | 1.9138  | 0.9362 | 819.0579  | 0.8339 | 0.0000000  |
| t0 | T80 | 1.8604  | 0.9458 | 782.7145  | 0.8333 | 0.0000000  |
| t0 | T80 | 1.9493  | 0.8311 | 806.9434  | 0.8025 | 0.0000000  |
| t1 | T80 | 2.3138  | 0.6454 | 1542.9845 | 0.7256 | 19.5167835 |
| t1 | T80 | 2.3404  | 0.6547 | 1560.1492 | 0.7196 | 30.0676613 |
| t1 | T80 | 2.2960  | 0.6347 | 1571.5924 | 0.7278 | 32.8857709 |
| t1 | T80 | 2.3227  | 0.6320 | 1568.7316 | 0.7266 | 23.9594964 |
| t2 | T80 | 2.3849  | 0.6623 | 1957.0256 | 0.7065 | 17.4133247 |
| t2 | T80 | 2.6338  | 0.6607 | 1915.8007 | 0.7156 | 29.4289147 |
| t2 | T80 | 2.3760  | 0.7204 | 1948.7806 | 0.7212 | 23.8266740 |
| t2 | T80 | 2.8649  | 0.6414 | 1871.8275 | 0.7003 | 22.8285303 |
| t3 | T80 | 2.9449  | 0.6907 | 2000.7780 | 0.6998 | 13.8736338 |
| t3 | T80 | 3.1582  | 0.6453 | 1989.8828 | 0.6854 | 31.0703186 |
| t3 | T80 | 3.2116  | 0.6618 | 1984.4352 | 0.6965 | 30.0259529 |
| t3 | T80 | 3.1316  | 0.6434 | 1995.3304 | 0.6912 | 22.5780611 |
| t4 | T80 | 3.4693  | 0.5160 | 2051.4715 | 0.5898 | 35.6563048 |
| t4 | T80 | 3.3627  | 0.5226 | 2056.9502 | 0.6033 | 44.1727586 |
| t4 | T80 | 3.2293  | 0.4940 | 2078.8650 | 0.5934 | 47.7690032 |
| t4 | T80 | 3.2382  | 0.4935 | 2070.6470 | 0.5886 | 40.6231610 |
| t5 | T80 | 4.2782  | 0.3310 | 2207.7857 | 0.3345 | 58.7211404 |
| t5 | T80 | 3.9760  | 0.3331 | 2191.4430 | 0.3387 | 64.4173093 |
| t5 | T80 | 4.0738  | 0.3443 | 2166.9289 | 0.3476 | 63.5974232 |
| t5 | T80 | 3.7627  | 0.3323 | 2158.7576 | 0.3565 | 60.0202429 |
| t6 | T80 | 6.9182  | 0.3076 | 2547.6680 | 0.1575 | 61.6392654 |
| t6 | T80 | 6.5627  | 0.3021 | 2508.0435 | 0.1421 | 67.7312818 |
| t6 | T80 | 5.9493  | 0.3061 | 2535.2853 | 0.1463 | 67.6337169 |
| t6 | T80 | 6.2249  | 0.2955 | 2547.6680 | 0.1522 | 64.4435753 |
| t7 | T80 | 8.1004  | 0.3164 | 2707.9071 | 0.0717 | 60.5428115 |
| t7 | T80 | 7.8516  | 0.3358 | 2716.3314 | 0.0803 | 64.1303626 |
| t7 | T80 | 7.0604  | 0.3450 | 2713.5233 | 0.0798 | 63.5205867 |
| t7 | T80 | 8.0293  | 0.3319 | 2719.1395 | 0.0889 | 60.0685117 |
| t8 | T80 | 9.3360  | 0.3384 | 2829.3565 | 0.0109 | 57.7946919 |
| t8 | T80 | 9.1582  | 0.3389 | 2820.8178 | 0.0187 | 63.7960415 |
| t8 | T80 | 9.8960  | 0.3288 | 2849.2801 | 0.0279 | 65.2332966 |
| t8 | T80 | 8.9627  | 0.3334 | 2840.7414 | 0.0219 | 59.8812682 |
| t9 | T80 | 11.8604 | 0.3706 | 2940.7977 | 0.0035 | 53.7837838 |
| t9 | T80 | 11.1404 | 0.3643 | 2940.7977 | 0.0039 | 61.0915905 |
| t9 | T80 | 13.1493 | 0.3721 | 2938.1883 | 0.0018 | 60.6519132 |

|    |     |         |        |           |        |            |
|----|-----|---------|--------|-----------|--------|------------|
| t9 | T80 | 11.4693 | 0.3636 | 2940.7977 | 0.002  | 56.2546145 |
| t0 | T90 | 1.9582  | 0.8019 | 813.0006  | 0.8007 | 0.0000000  |
| t0 | T90 | 1.9138  | 0.9362 | 819.0579  | 0.8339 | 0.0000000  |
| t0 | T90 | 1.8604  | 0.9458 | 782.7145  | 0.8333 | 0.0000000  |
| t0 | T90 | 1.9493  | 0.8311 | 806.9434  | 0.8025 | 0.0000000  |
| t1 | T90 | 2.5360  | 0.5874 | 1750.4476 | 0.6985 | 26.7509300 |
| t1 | T90 | 2.6782  | 0.5557 | 1794.1796 | 0.6813 | 40.6434125 |
| t1 | T90 | 2.5271  | 0.5639 | 1832.0807 | 0.6783 | 40.3732738 |
| t1 | T90 | 2.5360  | 0.5116 | 1872.8973 | 0.6834 | 38.4392559 |
| t2 | T90 | 3.1493  | 0.5578 | 1871.8227 | 0.667  | 30.4447691 |
| t2 | T90 | 2.8027  | 0.5639 | 1889.4072 | 0.6783 | 39.7627189 |
| t2 | T90 | 3.0427  | 0.5562 | 1874.7535 | 0.6505 | 41.1958375 |
| t2 | T90 | 3.0427  | 0.5388 | 1880.6150 | 0.6713 | 35.1712488 |
| t3 | T90 | 3.1938  | 0.5480 | 1926.3150 | 0.6256 | 31.6618301 |
| t3 | T90 | 3.2027  | 0.5688 | 1955.8547 | 0.6203 | 39.2429696 |
| t3 | T90 | 3.2027  | 0.5482 | 1917.4531 | 0.606  | 42.0415826 |
| t3 | T90 | 3.2027  | 0.5085 | 1935.1769 | 0.5795 | 38.8181363 |
| t4 | T90 | 3.7627  | 0.4752 | 1844.9971 | 0.5046 | 40.7421248 |
| t4 | T90 | 3.9404  | 0.4957 | 1767.0246 | 0.5207 | 47.0553121 |
| t4 | T90 | 3.7716  | 0.4775 | 1833.4456 | 0.516  | 49.5163025 |
| t4 | T90 | 3.7804  | 0.4768 | 1957.6240 | 0.5017 | 42.6339026 |
| t5 | T90 | 4.3849  | 0.3748 | 2142.7824 | 0.3086 | 53.2558303 |
| t5 | T90 | 4.3938  | 0.3788 | 2177.6167 | 0.3102 | 59.5331578 |
| t5 | T90 | 4.3849  | 0.3844 | 2148.5881 | 0.3202 | 59.3540808 |
| t5 | T90 | 4.5716  | 0.3793 | 2168.9081 | 0.3054 | 54.3565399 |
| t6 | T90 | 9.0071  | 0.2772 | 2879.0099 | 0.026  | 65.4357900 |
| t6 | T90 | 9.0160  | 0.2739 | 2876.0969 | 0.0302 | 70.7409603 |
| t6 | T90 | 8.9538  | 0.2725 | 2873.1840 | 0.025  | 71.1919916 |
| t6 | T90 | 8.9271  | 0.2760 | 2881.9228 | 0.0297 | 66.7899781 |
| t7 | T90 | 11.3538 | 0.2820 | 2886.1827 | 0.0045 | 64.8295709 |
| t7 | T90 | 11.3449 | 0.2824 | 2886.1827 | 0.0058 | 69.8347639 |
| t7 | T90 | 11.4427 | 0.2692 | 2897.7841 | 0.0052 | 71.5358219 |
| t7 | T90 | 11.3627 | 0.2908 | 2889.0831 | 0.0047 | 65.0131936 |
| t8 | T90 | 12.1804 | 0.3186 | 2903.9565 | 0.0036 | 60.2662829 |
| t8 | T90 | 12.2604 | 0.3143 | 2901.0309 | 0.0035 | 66.4318169 |
| t8 | T90 | 12.1893 | 0.3339 | 2901.0309 | 0.0038 | 64.6990069 |
| t8 | T90 | 12.1893 | 0.3469 | 2898.1052 | 0.0039 | 58.2582598 |
| t9 | T90 | 12.5804 | 0.4111 | 2956.8269 | 0.0019 | 48.7309672 |
| t9 | T90 | 12.5804 | 0.4306 | 2950.9808 | 0.002  | 53.9998052 |
| t9 | T90 | 12.6782 | 0.3743 | 2948.0577 | 0.0018 | 60.4231452 |
| t9 | T90 | 12.5893 | 0.3895 | 2953.9039 | 0.0018 | 53.1393350 |

## S2. Moisture

| Time        | Moisure_50  | Moisure_60  | Moisure_70  | Moisure_80  |
|-------------|-------------|-------------|-------------|-------------|
| Moisure_90  |             |             |             |             |
| 0           | 4.52503061  | 4.52503061  | 4.52503061  | 4.52503061  |
| 4.52503061  |             |             |             |             |
| 1           | 3.494043747 | 3.128335488 | 2.895887118 | 2.63551561  |
| 2.180385637 |             |             |             |             |
| 2           | 3.318898875 | 2.802968897 | 2.67242273  | 2.461700001 |
| 2.003751825 |             |             |             |             |
| 3           | 3.037413339 | 2.666062709 | 2.46488814  | 2.260746755 |
| 1.555197668 |             |             |             |             |
| 4           | 2.94761404  | 2.416569808 | 2.227154783 | 1.462193927 |

|             |             |             |             |             |
|-------------|-------------|-------------|-------------|-------------|
| 1.04447143  |             |             |             |             |
| 5           | 2.706244172 | 2.172770421 | 1.906983211 | 0.525401528 |
| 0.451683681 |             |             |             |             |
| 6           | 2.339004337 | 1.672106886 | 1.302470566 | 0.175868947 |
| 0.028521151 |             |             |             |             |
| 7           | 1.997782954 | 1.091803793 | 0.231034728 | 0.08721092  |
| 0.005075888 |             |             |             |             |
| 8           | 1.684800635 | 0.947292598 | 0.040016548 | 0.020291893 |
| 0.003713766 |             |             |             |             |
| 9           | 1.344267598 | 0.40940215  | 0.009108026 | 0.002808704 |
| 0.001878529 |             |             |             |             |
